# Supplementary material for: Design and modeling of electrode networks for code-division multiplexed resistive pulse sensing in microfluidic devices
Source: Royal Society of Chemistry journal article supplement (doi:10.1039/c7lc00545h), 2017-01-01
Supplement: c7lc00545h1.pdf [file c7lc00545h1.pdf]

Supplementary Figures

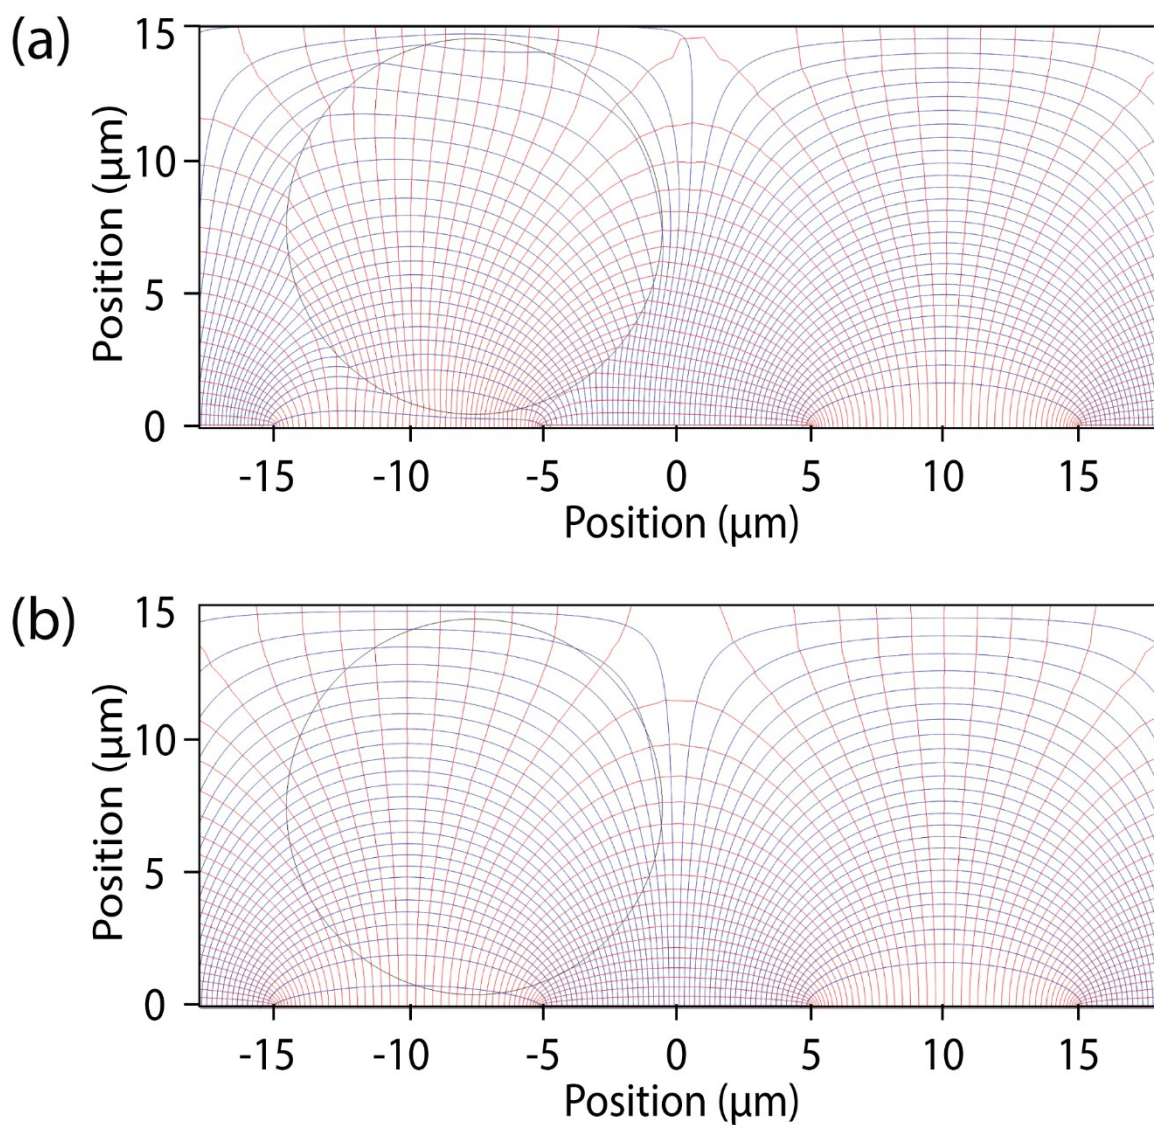

Fig. S1 Comparison of electric field line distribution within the microfluidic channel simulated using finite element analysis (a) with and (b) without the electric field perturbation due to presence of the cell. The cell has a  $7\ \mu\text{m}$  radius, is vertically centered in a  $15\ \mu\text{m}$ -high microfluidic channel.

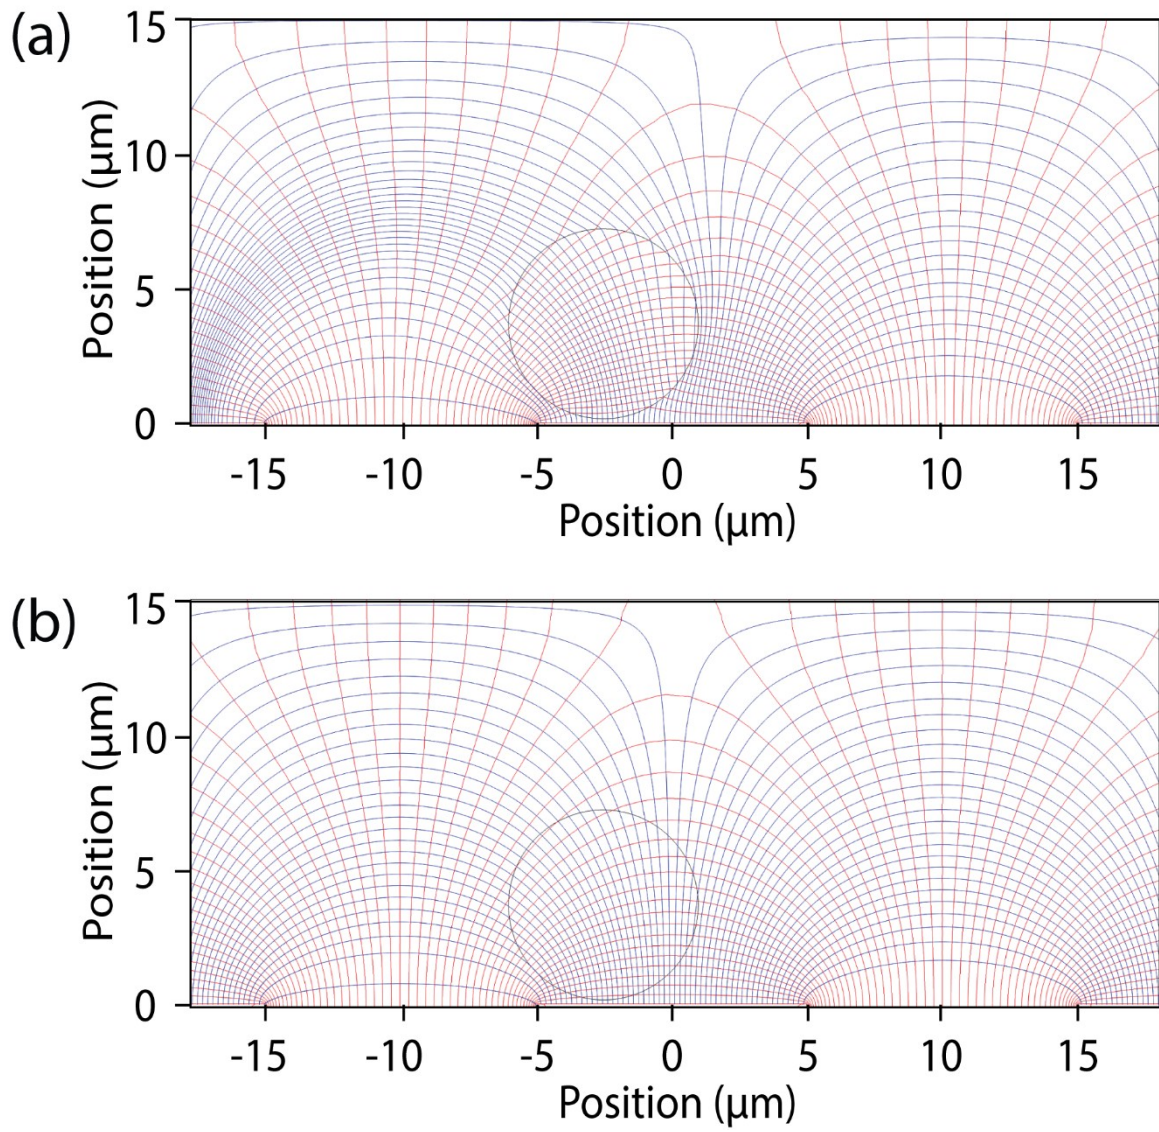

Fig. S2 Comparison of electric field line distribution within the microfluidic channel simulated using finite element analysis (a) with and (b) without the electric field perturbation due to presence of the cell. The cell has a 2.5  $\mu\text{m}$  radius, is positioned at a vertical position corresponding to  $\frac{1}{4}$  of the 15  $\mu\text{m}$ -high microfluidic channel.
